# Supplementary material for: Systematical Characterization of the AT-Hook Gene Family in Juglans regia L. and the Functional Analysis of the JrAHL2 in Flower Induction and Hypocotyl Elongation
Source: MDPI journal article supplement (doi:10.3390/ijms24087244), 2023-04-14
Supplement: s1 [file s1]

**Supplementary Table S2. Prediction of subcellular localization of JrAHL proteins.**

| <b>Protein Name</b> | <b>Localization</b>                  |
|---------------------|--------------------------------------|
| JrAHL1              | Nucleus                              |
| JrAHL2              | Nucleus                              |
| JrAHL3              | Nucleus                              |
| JrAHL4              | Nucleus                              |
| JrAHL5              | Nucleus                              |
| JrAHL6              | Nucleus                              |
| JrAHL7              | Nucleus                              |
| JrAHL8              | Nucleus                              |
| JrAHL9              | Nucleus                              |
| JrAHL10             | Chloroplast                          |
| JrAHL11             | Chloroplast                          |
| JrAHL12             | Nucleus                              |
| JrAHL13             | Nucleus                              |
| JrAHL14             | Nucleus                              |
| JrAHL15             | Nucleus                              |
| JrAHL16             | Nucleus. Chloroplast.                |
| JrAHL17             | Nucleus                              |
| JrAHL18             | Nucleus                              |
| JrAHL19             | Nucleus                              |
| JrAHL20             | Nucleus                              |
| JrAHL21             | Nucleus                              |
| JrAHL22             | Nucleus                              |
| JrAHL23             | Nucleus                              |
| JrAHL24             | Nucleus                              |
| JrAHL25             | Nucleus. Chloroplast.                |
| JrAHL26             | Nucleus                              |
| JrAHL27             | Nucleus                              |
| JrAHL28             | Nucleus                              |
| JrAHL29             | Nucleus                              |
| JrAHL30             | Nucleus                              |
| JrAHL31             | Nucleus. Chloroplast.                |
| JrAHL32             | Nucleus                              |
| JrAHL33             | Chloroplast                          |
| JrAHL34             | Nucleus                              |
| JrAHL35             | Nucleus. Chloroplast. Mitochondrion. |
| JrAHL36             | Nucleus. Chloroplast.                |
| JrAHL37             | Nucleus                              |
