# Supplementary material for: Systematical Characterization of the AT-Hook Gene Family in Juglans regia L. and the Functional Analysis of the JrAHL2 in Flower Induction and Hypocotyl Elongation
Source: MDPI journal article supplement (doi:10.3390/ijms24087244), 2023-04-14
Supplement: s1 [file s1]

**Supplementary Table S1. Primers were used in this study.**

| Gene name | primer name  | primer sequence (5' → 3' )             | purpose             |
|-----------|--------------|----------------------------------------|---------------------|
| JrAHL1    | JrAHL1-qF    | CTGTCGTAGCACTTCACGGA                   | RT-qPCR             |
|           | JrAHL1-qR    | GGAACCTACCACGCTTCCTC                   | RT-qPCR             |
| JrAHL2    | JrAHL2-F     | ATGGACCCAGTCACAGCAC                    | gene cloning        |
|           | JrAHL2-R     | TTAATAAGGAGAGCGACCCGTG                 | gene cloning        |
|           | JrAHL2-2300F | ACGAGCTCGGTACCATGGACCCAGTCACAGCAC      | vector construction |
|           | JrAHL2-2300R | CATGGTGTCTGACTCTAGAATAAGGAGAGCGACCCGTG | vector construction |
|           | JrAHL2-qF    | CGAAGTCGCTAATGGTTGCG                   | RT-qPCR             |
|           | JrAHL2-qR    | GAAGCAGGTTGCCTTAGGGT                   | RT-qPCR             |
|           | JrAHL7       | GGTTGGTCCGCTTCTAGCAT                   | RT-qPCR             |
| JrAHL7    | JrAHL7-qF    | CTGCTGTGACTGTTGTTGCC                   | RT-qPCR             |
|           | JrAHL7-qR    | CTGCTGTGACTGTTGTTGCC                   | RT-qPCR             |
| JrAHL10   | JrAHL10-qF   | GTCATCCCAAAAGCGGGGTA                   | RT-qPCR             |
|           | JrAHL10-qR   | AGTAAAACCCATCCCAGCCG                   | RT-qPCR             |
| JrAHL11   | JrAHL11-qF   | CATGGCGACAGTTCAGCTTG                   | RT-qPCR             |
|           | JrAHL11-qR   | CACTTCATTTGGCTGGCACC                   | RT-qPCR             |
| JrAHL14   | JrAHL14-qF   | GAGCAGGTGGCTTGACGATA                   | RT-qPCR             |
|           | JrAHL14-qR   | GAAGTGGCGACTCTTCCTCC                   | RT-qPCR             |
| JrAHL19   | JrAHL19-qF   | CCACAACAACAGCAACAGCA                   | RT-qPCR             |
|           | JrAHL19-qR   | GGTTTGCGACTTTTGGGCTT                   | RT-qPCR             |
| JrAHL28   | JrAHL28-qF   | AAATGGTGGCAGTCGTAGCA                   | RT-qPCR             |
|           | JrAHL28-qR   | GCTGCCATTAGCATTCCTGC                   | RT-qPCR             |
| JrAHL31   | JrAHL31-qF   | TTGGTGGTGCTGTTGCAATG                   | RT-qPCR             |
|           | JrAHL31-qR   | GTGACTCTGAGCCTCCGAAC                   | RT-qPCR             |
| JrAHL33   | JrAHL33-qF   | TTCGTATCAATTGCCGCACC                   | RT-qPCR             |
|           | JrAHL33-qR   | TGGTATTGCGGATCTTCCTCG                  | RT-qPCR             |

|           |            |                           |         |
|-----------|------------|---------------------------|---------|
| Jr18SrRNA | Jr18S-qF   | AGAACAGTCAGGGGCATTCTG     | RT-qPCR |
|           | Jr18S-qR   | ATCCCTCGTTGGCATCGTTT      | RT-qPCR |
| AtFT      | AtFT-qF    | TGCAGGAATTCATCGTGTCTGTGTT | RT-qPCR |
|           | AtFT-qR    | CTTCTTCCTCCGCAGCCACTCT    | RT-qPCR |
| AtActin   | AtACTIN-qF | GCGATTCCGTTGTCCTGAGGTTC   | RT-qPCR |
|           | AtACTIN-qR | TTCCACCACTGAGCACAATGTTACC | RT-qPCR |

---
